# Supplementary material for: Log2Lose: Development and Lessons Learned From a Mobile Technology Weight Loss Intervention
Source: PubMed Central journal article supplement (PMC6391641; doi:10.2196/11972), 2019-02-13
Supplement: mhealth_v7i2e11972_fig.pdf [file mhealth_v7i2e11972_fig.pdf]

This image was purchased from istockphoto.com on 12/18/2018 by the Duke University School of Nursing

Audio **iStock**  
by Getty Images

photos, vectors and more...

voices Downloads Apps

**Profile**

**Details**

- Address and billing details
- Change password
- Email preferences

**Update account profile**

Profile information is synced across Getty Images sites. See our [privacy policy](#).

Your customer number: 8153256

First name

Last name

Company email

Company name

Not applicable

**Save changes**

Account #8153256



**December 18, 2018 5:58 AM**

---

Stock file ID: **898378948**

License: **Standard**

Collection: **Essentials**
